# Supplementary material for: Recent advances in versatile pyridazine-cored materials: principles, applications, and challenges
Source: Royal Society of Chemistry journal article supplement (doi:10.1039/d2tc03716e), 2023-01-01
Supplement: d2tc03716e1.pdf [file d2tc03716e1.pdf]

*Electronic supplementary materials for:*

**Recent Advances in Versatile Pyridazine-Cored Materials: Principles,  
Applications, and Challenges**

Jing Zhang,<sup>1,†</sup> Yanze Jiang,<sup>1,†</sup> Xiaojie Cheng,<sup>1</sup> Yingjie Xie,<sup>1</sup> Jianfeng Zhao,<sup>1,\*</sup> Jiena Weng<sup>2,\*</sup>

**Table S1.** The basic parameters of melting points, pKa values, and theoretical aromaticity of

PD, pyrimidine, pyrazine

| Names      | b.p./ °C | Aromaticity multicenter indices (MCI/ $I_{\text{ring}}$ ) [3] | pKa(CH <sub>3</sub> CN) [1] | pKa(H <sub>2</sub> O) [1] | Atomic heats [2] of PD (N-N bond/N=N bond) kcal/mol |
|------------|----------|---------------------------------------------------------------|-----------------------------|---------------------------|-----------------------------------------------------|
| Pyridazine | 208      | 0.044/0.0304                                                  | 10.07                       | 2.33                      | 1038.8/1014.6                                       |
| Pyrimidine | 123-124  | 0.042/0.042                                                   | 8.72                        | 1.3                       | -                                                   |
| Pyrazine   | 115-118  | 0.0304/0.0291                                                 | 7.74                        | 0.6                       | -                                                   |

[1] A. Albert, J. N. Philli. *J. Chem. Soc.*, 1956, 1294-1304.

[2] J. Tjebbes. *Acta Chem. Scand.*, 1962, **16**, 916.

[3] J. Cioslowski, E. Matito, M. Solà, *J. Phys. Chem. A*, 2007, **111**, 6521-6525. [Lit. 133] in the context.
